# Supplementary material
Source: Research Square preprint supplement (doi:10.21203/rs.3.rs-9520506/v1)
Supplement: Supplementary file 1 [file 009f6d27349bb8b736b3b335.docx]

**Rhodium-enhanced reducibility and coke resistance in low-loading Ni and Co/Al2O3 catalysts for CO2 methanation**

*Robinson L. Manfro1, Julia F. P. Nascimento, Mariana M.V.M. Souza1 Carlos Alberto Chagas1**

1School of Chemistry - Federal University of Rio de Janeiro, P.O. BOX 68542, CEP 21941-909 - Rio de Janeiro/RJ, Brazil.

*Email: [carlos@eq.ufrj.br](mailto:carlos@eq.ufrj.br)

**SUPPORTING INFORMATION**

***1. Specific surface area (BET)***

The N2 adsorption-desorption isotherms are shown in Fig. S1.

**Figure S1:** (a) N2 adsorption-desorption isotherm and (b) pore size distribution of the calcined catalysts.

**Table S1.** Chemical composition and textural properties of the calcined catalysts.

| **Catalyst** | **Metal content (wt.%)** | | | **SBETa (m2/g)** | **Sext b**  **(m2/g)** | **Vtotalc**  **(cm3/g)** | **Vmesod**  **(cm3/g)** | **DBJHe**  **(nm)** | **Mesop.f**  **(%)** |
| --- | --- | --- | --- | --- | --- | --- | --- | --- | --- |
| **Rh** | **Ni** | **Co** |
| RhAlO | 1.86 | - | - | 169 | 171 | 0.415 | 0.418 | 8.7 | 100 |
| CoRhAlO | 0.81 | - | 2.8 | 153 | 145 | 0.383 | 0.381 | 9.1 | 99.4 |
| NiRhAlO | 0.79 | 2.9 | - | 175 | 169 | 0.442 | 0.441 | 8.9 | 99.8 |

aCalculated using the BET method; bDerived from the t-plot method; cEstimated as the sum of the t-plot micropore volume; dDetermined from the BJH desorption cumulative pore volume; e Average pore diameter (BJH desorption, 4V/A); fCalculated as (Vmeso /Vtotal) x 100%.

**2. XRD patterns of the calcined catalysts and γ-Al2O3 support, and reduced catalysts.**

**Figure S2.** (a) XRD patterns of the calcined catalysts and γ-Al2O3 support, and (b) reduced catalysts.

**3. H2-TPR profiles**

**Figure S3.** H2-TPR profiles of the calcined catalysts and γ-Al2O3 support.

**3. H2-TPD results and percentage reduction**

**Table S2.** Metal dispersion, crystallite size, and reduction degree of the catalysts determined by H2-TPD and H2-TPR.

| **Catalyst** | **H2 uptake (μmol/gcat)a** | **Dispersion (%)b** | **Particle size (nm)c** | **Reduction degree (%)d** |
| --- | --- | --- | --- | --- |
| RhAlO | 50.7 | 55 | 1.95 | ~100 |
| NiRhAlO | 41.3 | 14.4 | 7.01 | ~100 |
| CoRhAlO | 41.5 | 15 | 6.7 | ~100 |

aH2 uptake calculated from H2-TPD

bDispersion calculated from H2-TPD, assuming metal or metal alloy/H surface = 1

cParticle size calculated from H2-TPD

dCalculated from H2-TPR

**4. CO2-TPD profiles**

**Figure S4.** CO₂-TPD profiles of the reduced catalysts.

**5. Spent catalyst analysis**

**Figure S5.** XRD patterns of the spent catalysts after the 30 h stability test.

**6. Thermogravimetric analysis (TGA) of the spent catalysts**

TGA profiles of the catalysts tested after 30 h on stream at 450 °C are shown in Figure S6.

**Figure S6.** Thermogravimetric analysis (TGA) and differential thermal analysis (DTA) of the spent catalysts after the 30 h on stream at 450 °C.

**7. Raman analysis**

**Figure S7.** Raman measurements of the spent catalysts after the 30 h on stream at 450 °C.
